# Supplementary material
Source: PubMed Central journal article supplement (PMC4394015)

## FIGURE LEGEND

**Figure 1. Comparison of HLA alleles at the 2-digit and 4-digit levels in association with chronic HCV infection.** The HLA-B\*07, B\*13, B\*15 alleles assigned at the 2-digit level were compared with their subordinates assigned at the 4-digit alleles. \* $q < 0.1$ ; \*\* $q < 0.05$ .

## Supporting information legends

**Supplementary Figure S1. HCV subtype 1b and 6a phylogeny estimated by MEGA5 software.** Subtype 1b (a) and 6a (b) phylogeny estimated from NS5B region sequences (H77 positions: 8276–8615). Subtype 1a sequence d14853 and Subtype 6n sequence km42 were used as outgroups, respectively. Red circles label reference sequences. Boot strap values are shown in the tree root. Scale bar represents 0.05 nucleotide substitutions per site.

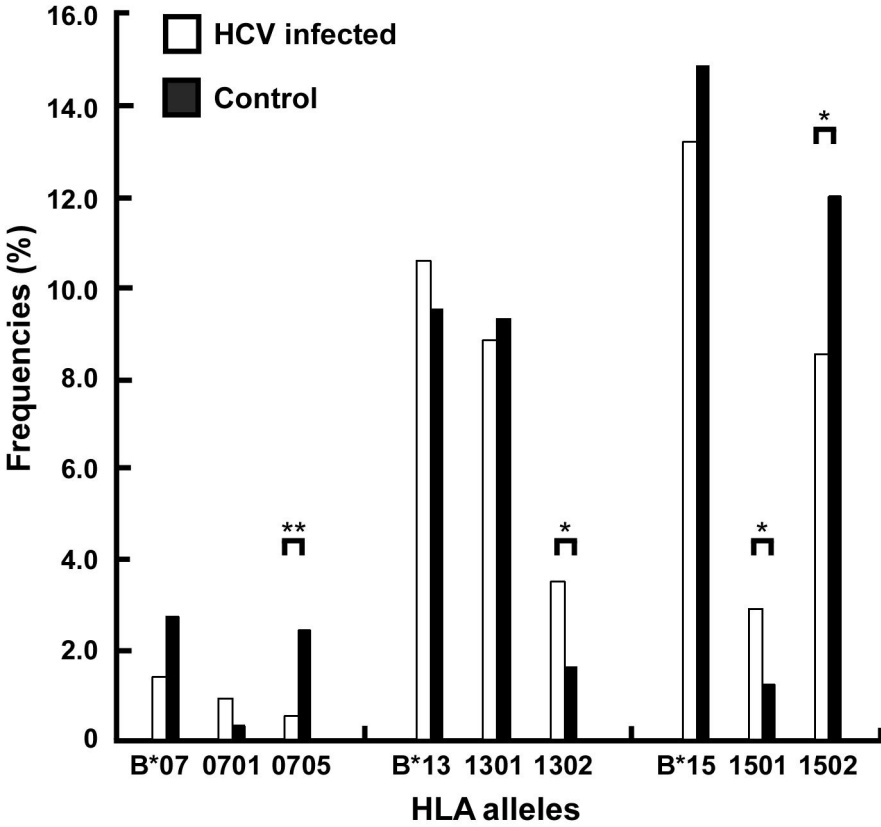

**A**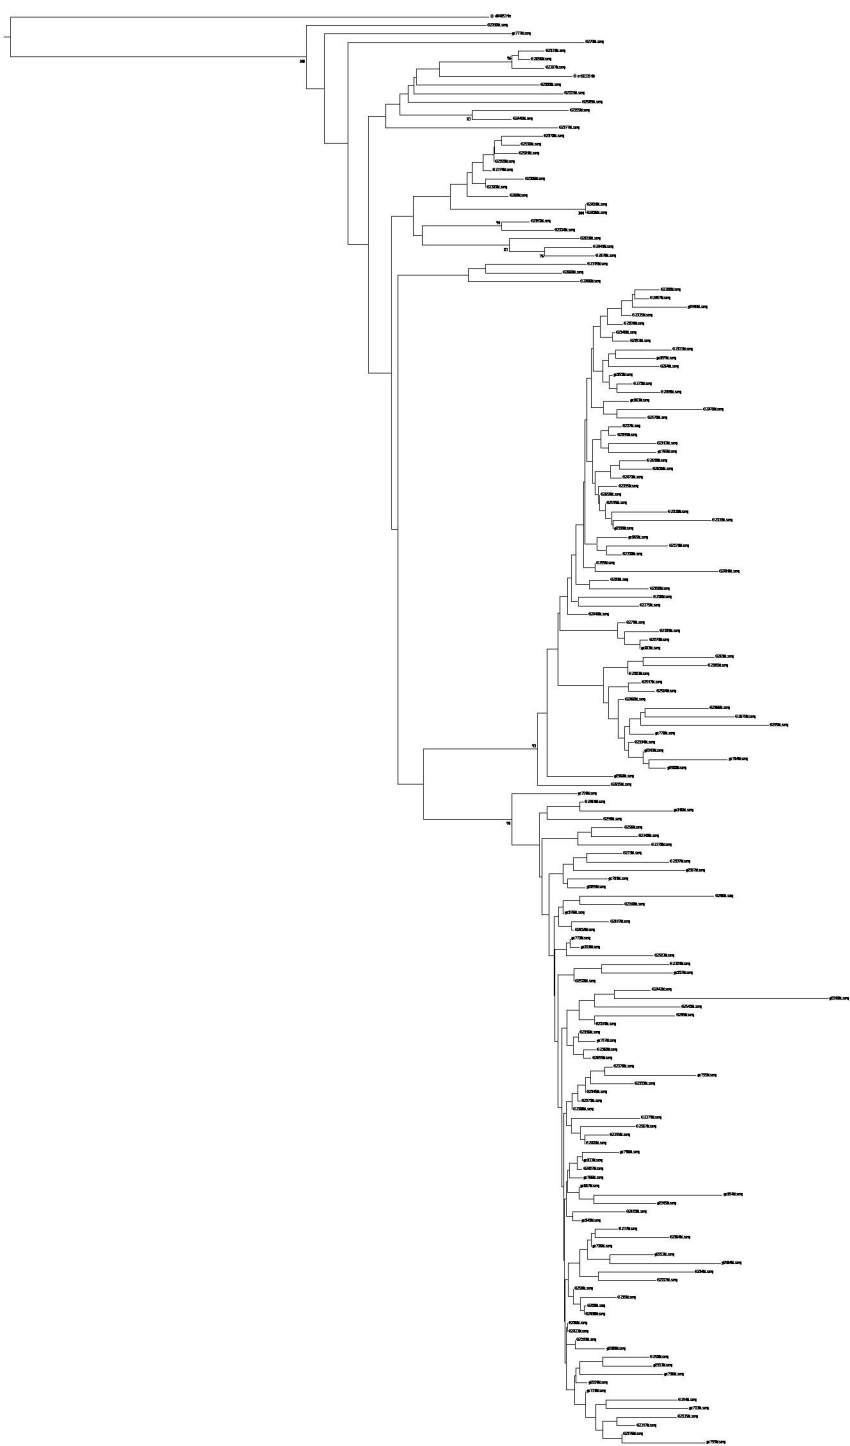**B**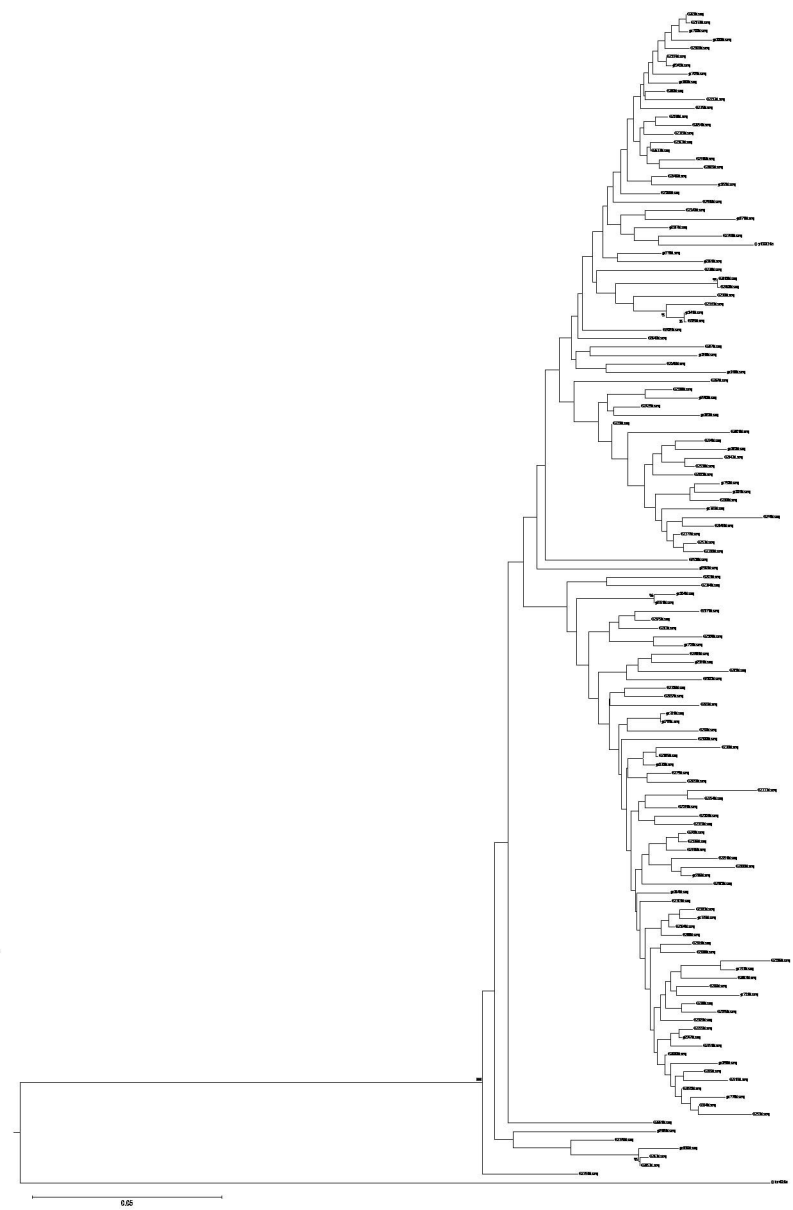

Supplement: NIHMS641163-supplement-supplement_1.pdf [file NIHMS641163-supplement-supplement_1.pdf]
